# Supplementary material for: Screening of quinoline, 1,3-benzoxazine, and 1,3-oxazine-based small molecules against isolated methionyl-tRNA synthetase and A549 and HCT116 cancer cells including an in silico binding mode analysis
Source: Royal Society of Chemistry journal article supplement (doi:10.1039/c5ob00791g), 2015-01-01

**Screening of Quinoline, 1,2-benzoxazine, and 1,3-oxazine- based small molecules against targeting isolated methionyl-tRNAsynthetase and A549 and HCT116 cancer cells including an in silico binding mode analysis**

Hanumantharayappa Bharathkumar, Chakrabhavi Dhananjaya Mohan, Shobith Rangappa, Taehee Kang, Keerthy H K, Julian E. Fuchs, Nam Hoon Kwon, Andreas Bender, Sunghoon Kim, Basappa, Kanchugarakoppal S Rangappa

**Supplementary Table 1:** List compounds structures used for MRS screening:

| Compound Number | Structure                                                                            |
|-----------------|--------------------------------------------------------------------------------------|
| Compound-1      | 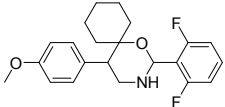 |
| Compound-2      |  |
| Compound-3      |  |
| Compound-4      |  |
| Compound-5      |  |
| Compound-6      |  |

|             |                                                                                      |
|-------------|--------------------------------------------------------------------------------------|
| Compound-7  | 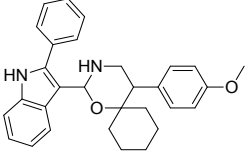   |
| Compound-8  |    |
| Compound-9  |    |
| Compound-10 |    |
| Compound-11 |  |
| Compound-12 |  |
| Compound-13 |  |
| Compound-14 |  |
| Compound-15 |  |
| Compound 16 |  |

|             |                                                                                      |
|-------------|--------------------------------------------------------------------------------------|
| Compound 17 | 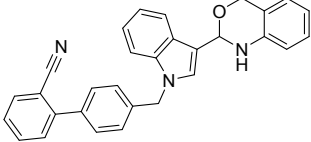   |
| Compound-18 |    |
| Compound 19 |    |
| Compound 20 |    |
| Compound 21 |   |
| Compound 22 |  |
| Compound 23 |  |
| Compound 24 |  |
| Compound 25 |  |
| Compound 26 |  |

|             |                                                                                                                                    |
|-------------|------------------------------------------------------------------------------------------------------------------------------------|
| Compound 27 | 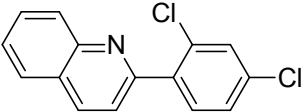<br><chem>Clc1ccc(Cl)cc1-c2cnc3ccccc23</chem>    |
| Compound 28 | <br><chem>Nc1ccc(cc1)-c2cnc3cc(Cl)cc32</chem>    |
| Compound 29 | <br><chem>Clc1ccc(Cl)cc1-c2c(C)nc3ccccc23</chem> |

**Compound 2: 2-(2-butyl-4-chloro-1H-imidazol-5-yl)-5-(4-methoxyphenyl)-1-oxa-3-azaspiro[5.5]undecane.**

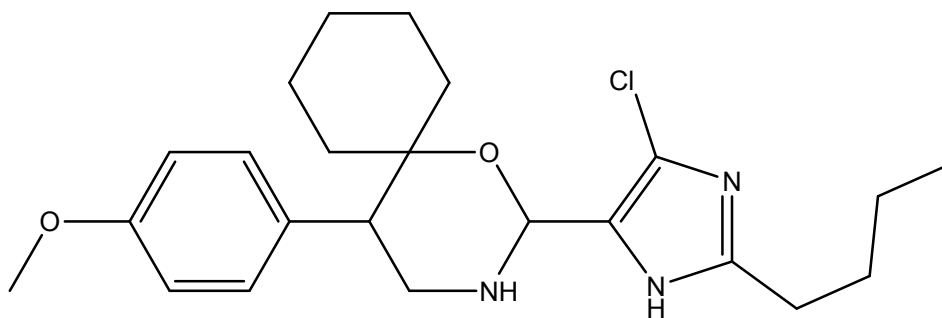

**<sup>1</sup>H NMR:**

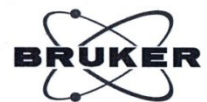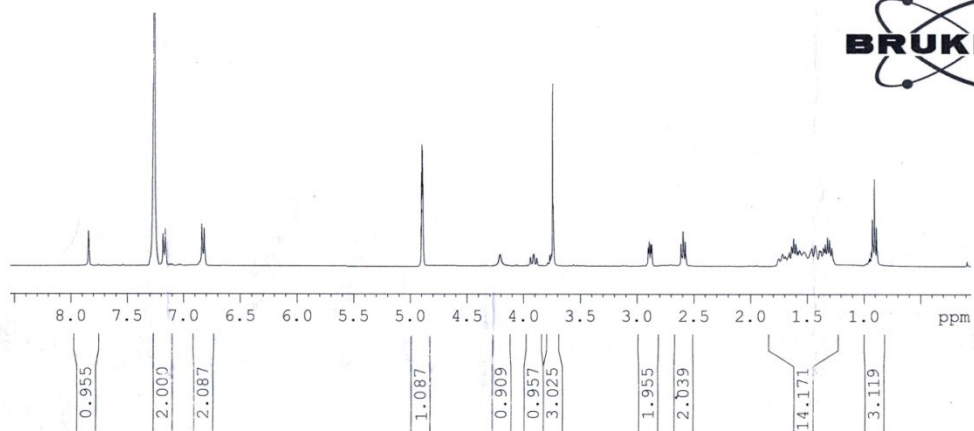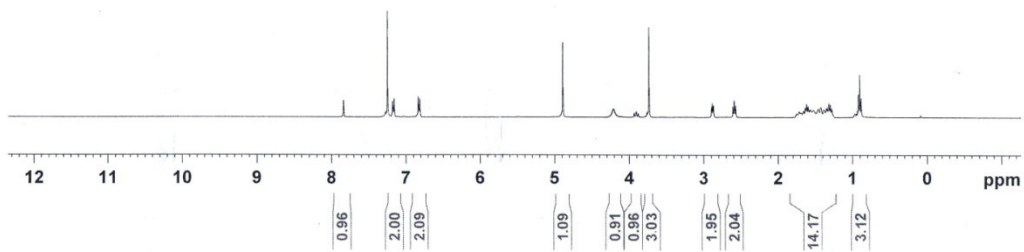

**<sup>13</sup>C NMR:**

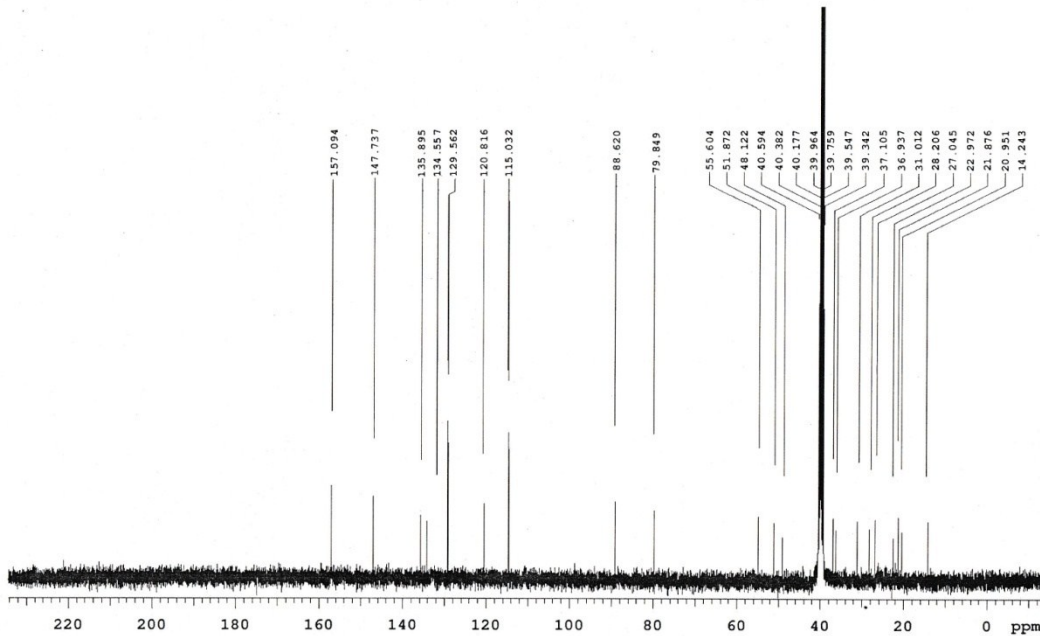

**Mass:**

Method DEF\_MS.M

Sample Name

Operator  
Instrument

MBU  
HCTultra ETD II

**Acquisition Parameter**

Ion Source Type ESI  
Mass Range Mode 319  $\mu$ s  
Capillary Exit 109.0 Volt  
Accumulation Time Ultra Scan

Ion Polarity Positive  
Scan Begin 50 m/z  
Skimmer 40.0 Volt  
Averages 5 Spectra

Alternating Ion Polarity off  
Scan End 1300 m/z  
Trap Drive 49.6  
Auto MS/MS off

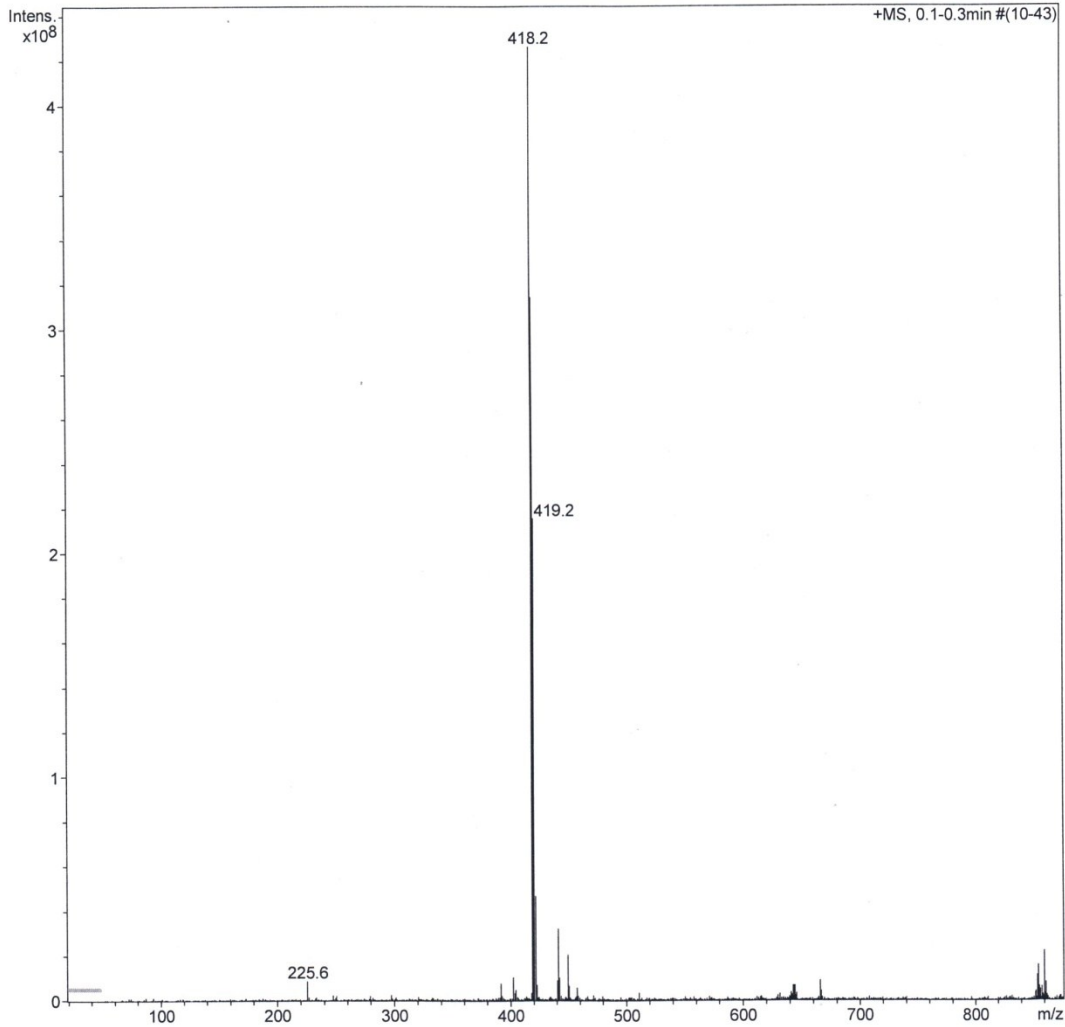



Compound 3: 2-(1H-indol-3-yl)-5-(4-methoxyphenyl)-1-oxa-3-azaspiro[5.5]undecane

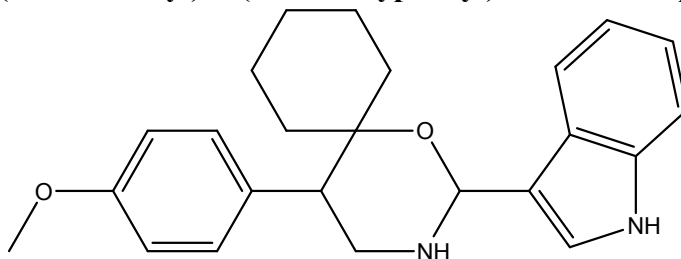

<sup>1</sup>H NMR

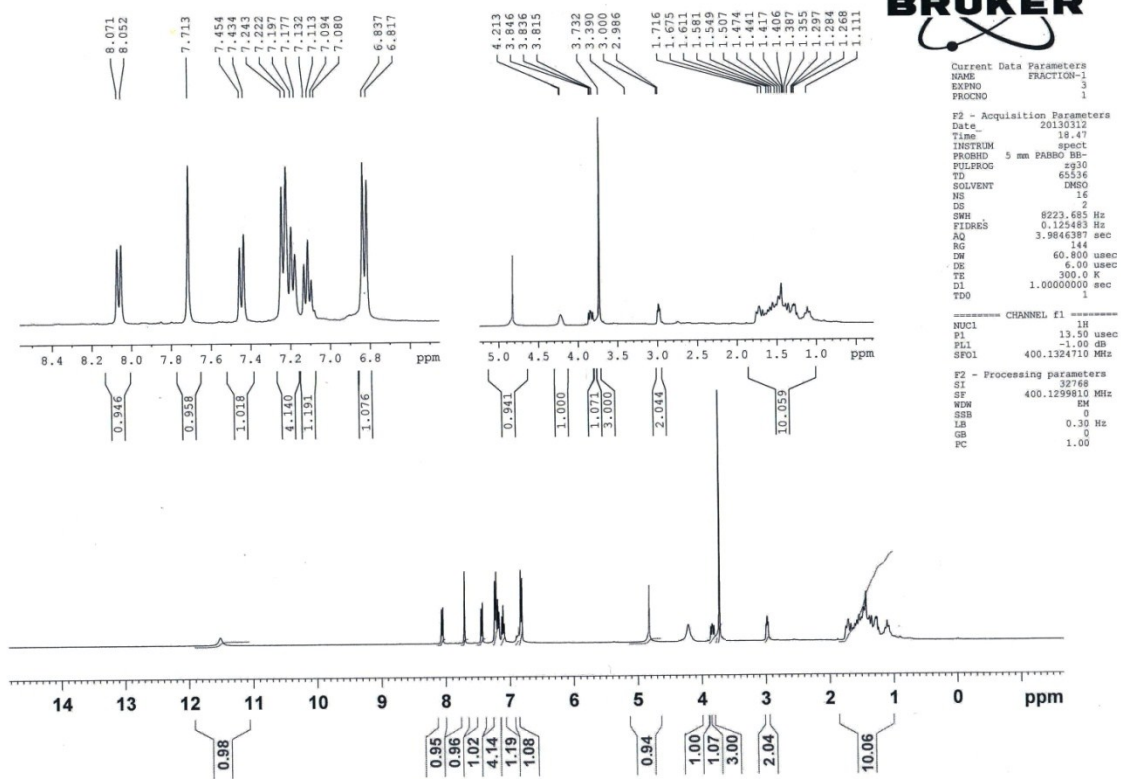

**<sup>13</sup>C NMR:**

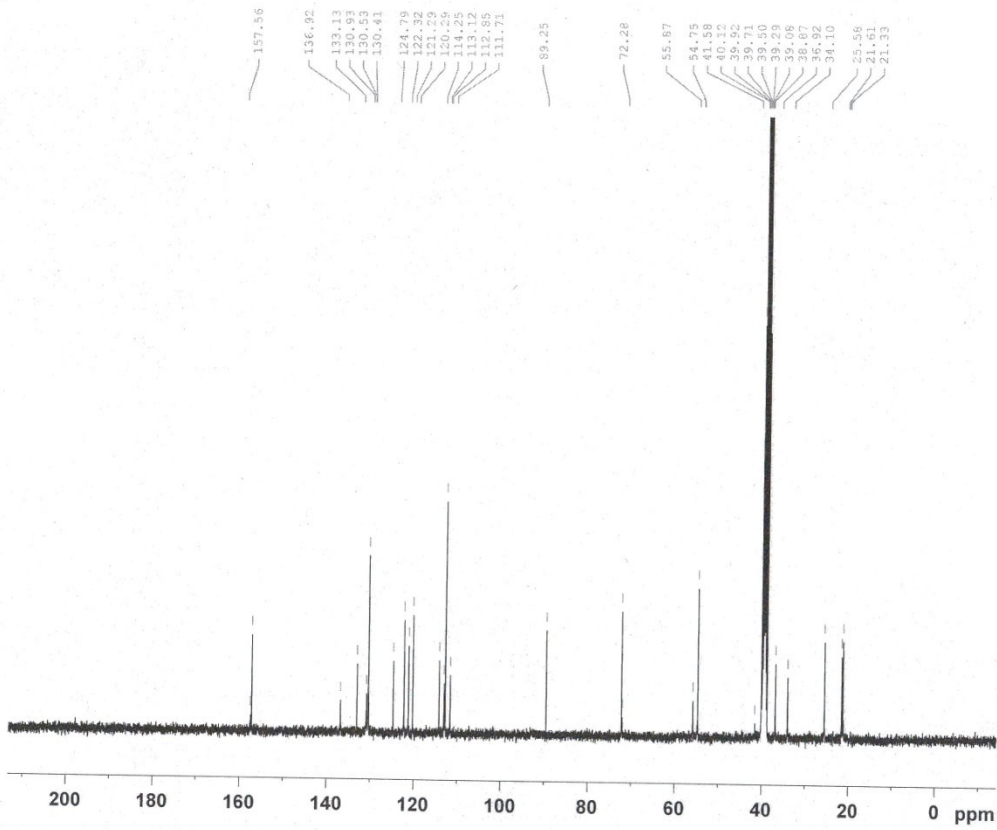

**Mass:**

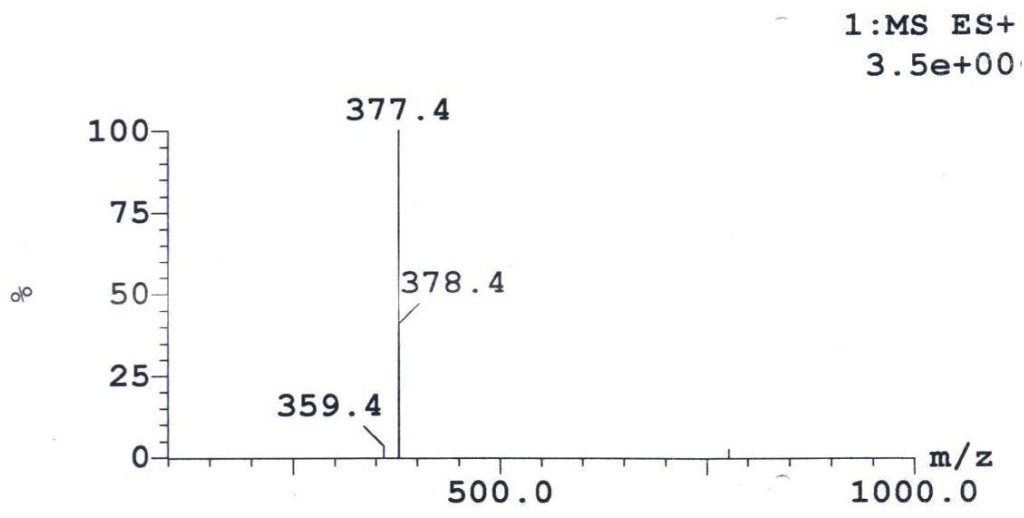

**Compound 4: 2-(4-bromophenyl)-5-(4-methoxyphenyl)-1-oxa-3-azaspiro[5.5]undecane**

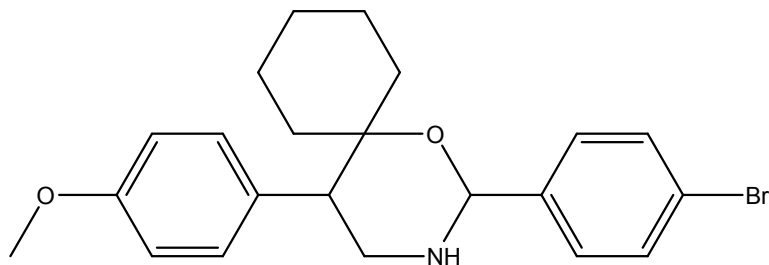

**<sup>1</sup>H-NMR:**

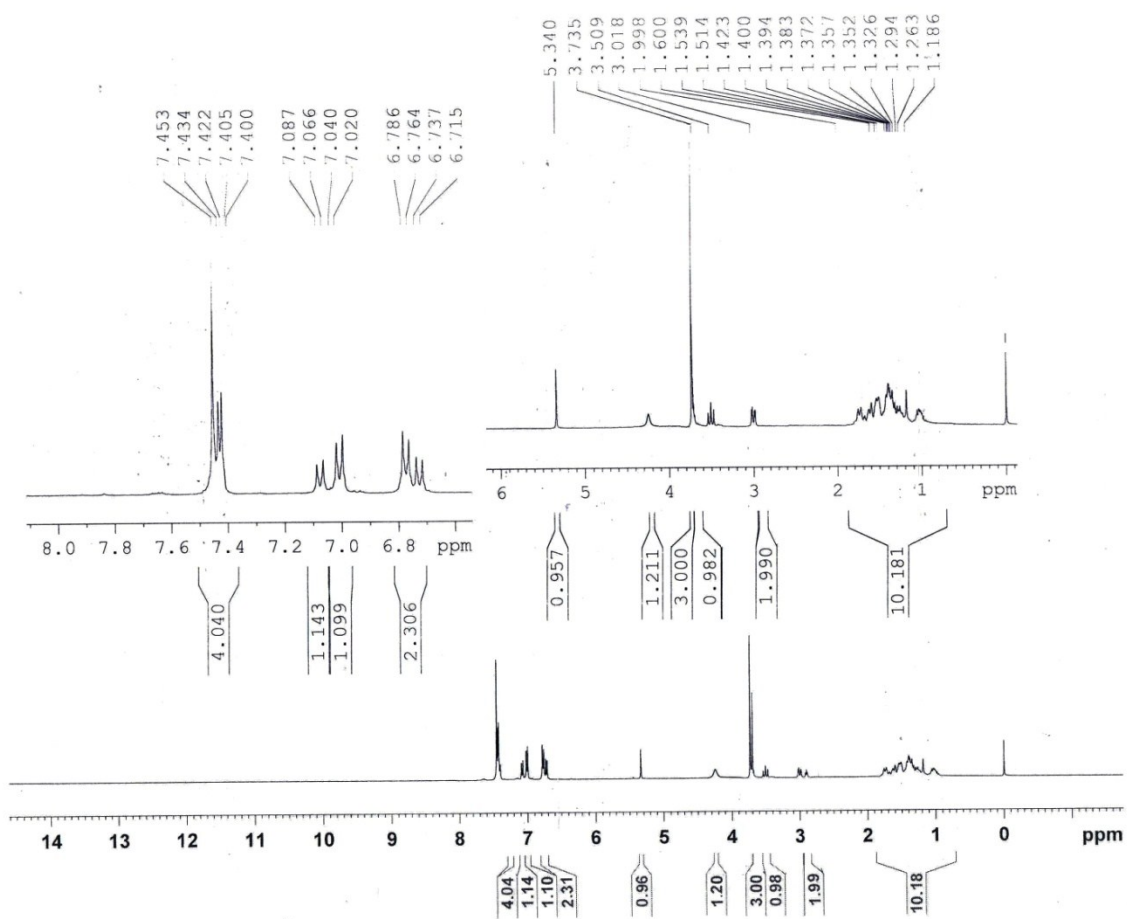

**<sup>13</sup>C NMR:**

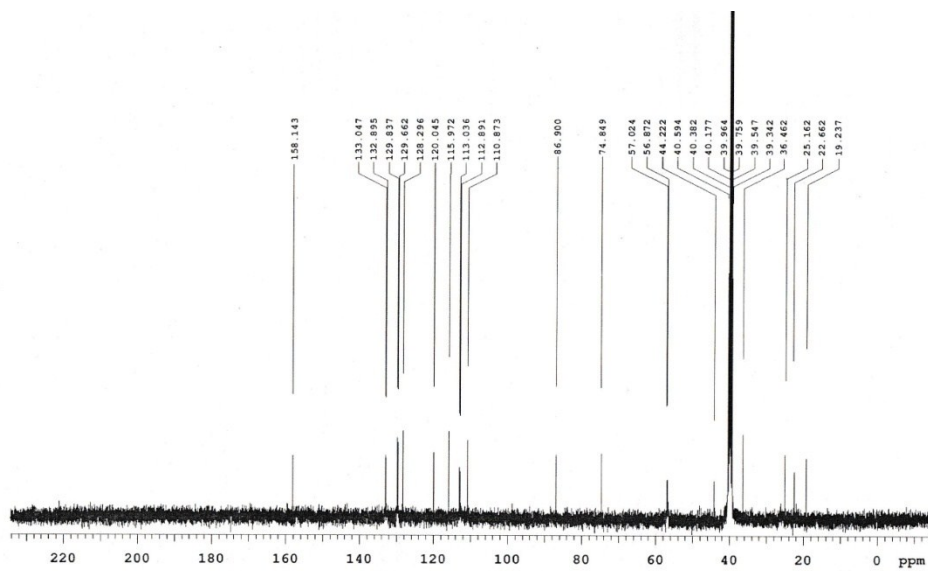

**Mass:**

Method DEF\_MS.M  
Sample Name  
**Acquisition Parameter**  
Ion Source Type ESI  
Mass Range Mode 200000  $\mu$ s  
Capillary Exit 109.0 Volt  
Accumulation Time Ultra Scan

Ion Polarity Positive  
Scan Begin 50 m/z  
Skimmer 40.0 Volt  
Averages 5 Spectra

Operator MBU  
Instrument HCTultra.ETD II  
Alternating Ion Polarity off  
Scan End 900 m/z  
Trap Drive 49.6  
Auto MS/MS off

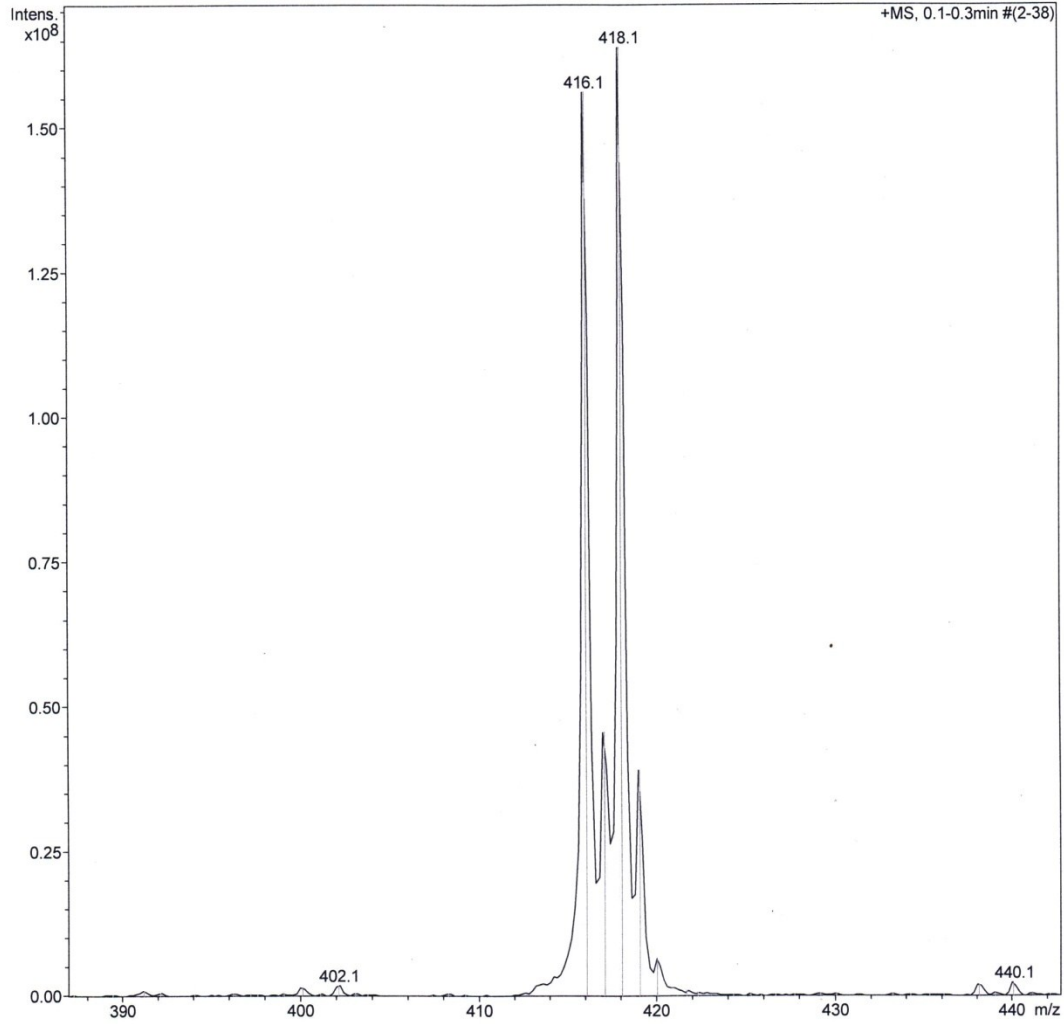

**Compound 5: 4'-((2-butyl-4-chloro-5-(5-(4-methoxyphenyl)-1-oxa-3-azaspiro[5.5]undecan-2-yl)-1H-imidazol-1-yl)methyl)-[1,1'-biphenyl]-2-carbonitrile**

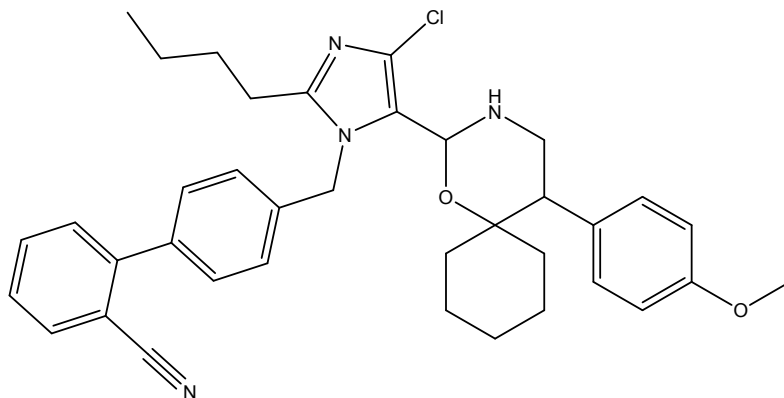

<sup>1</sup>H-NMR:

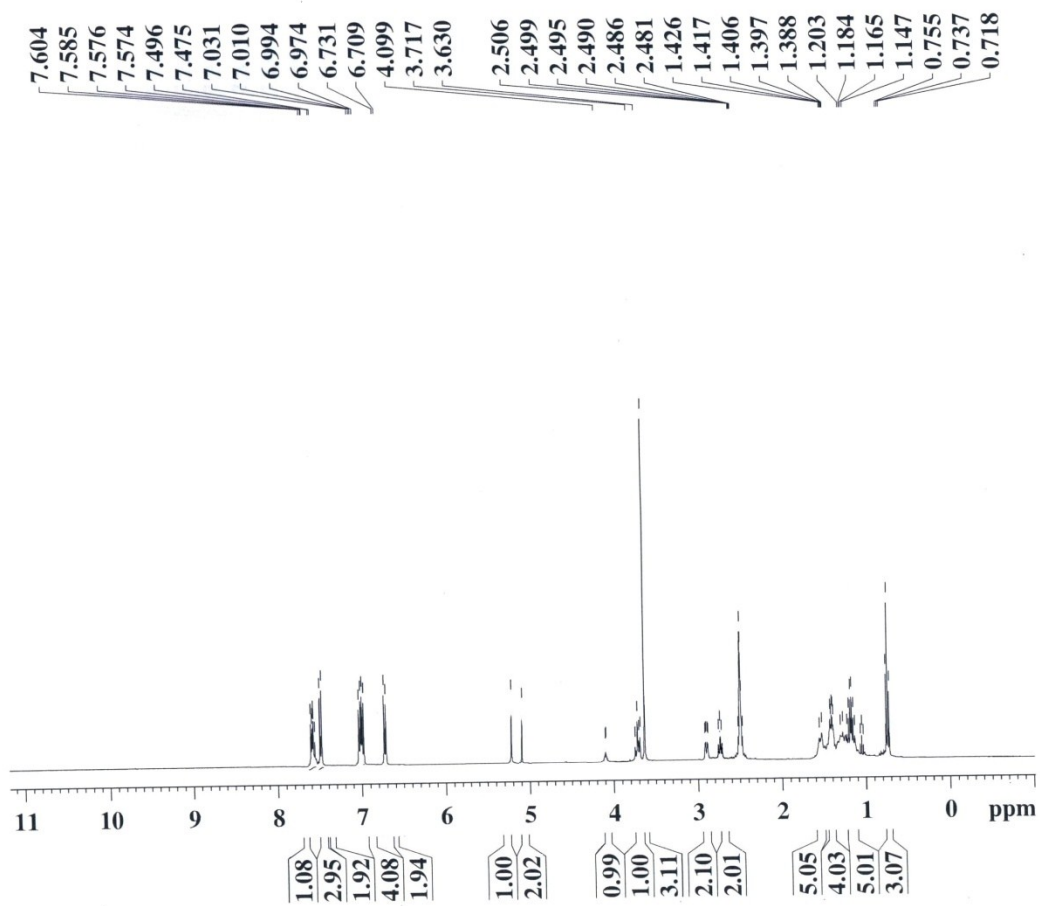

**<sup>13</sup>C-NMR:**

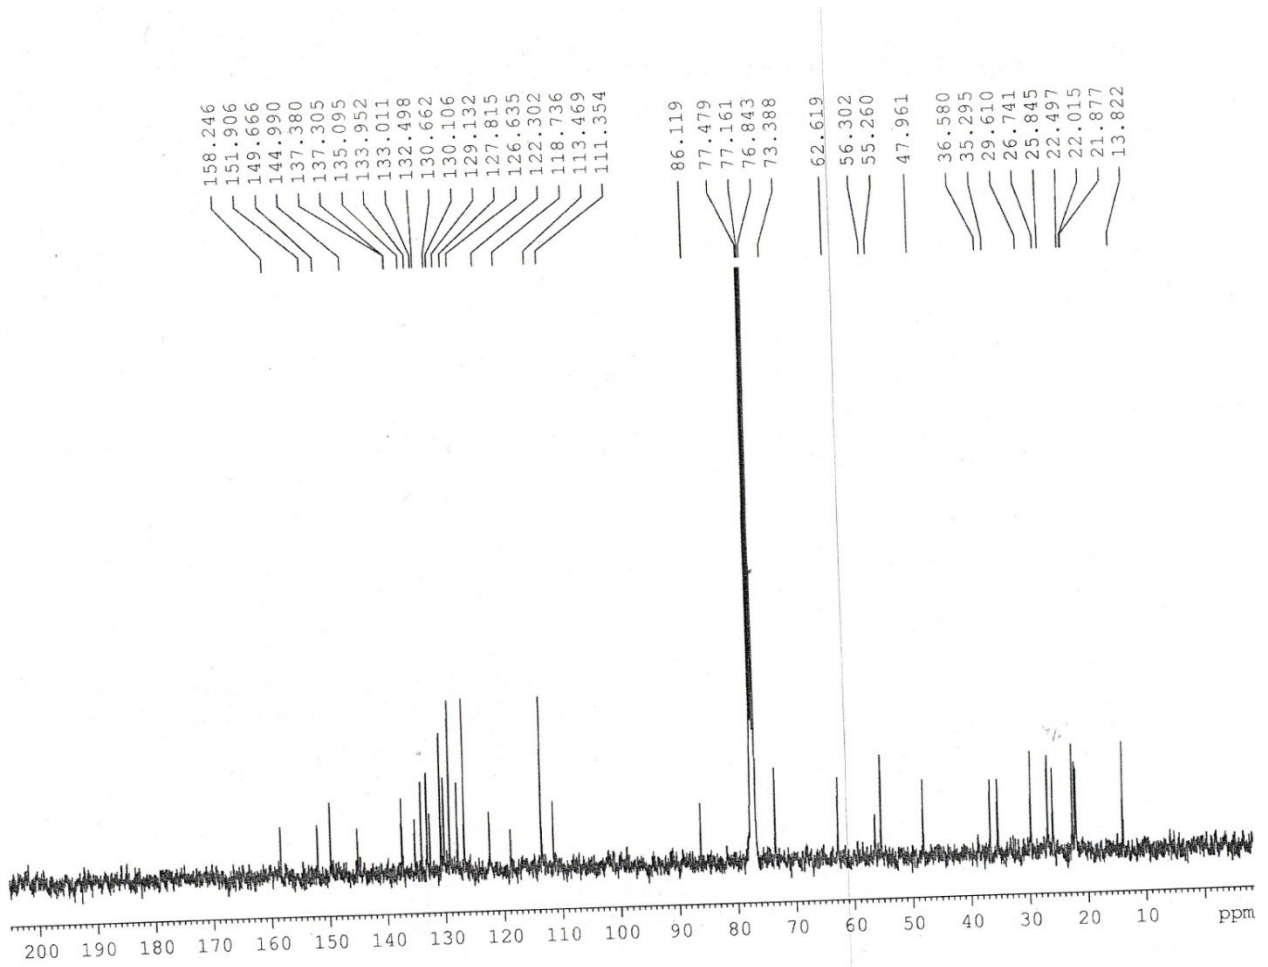

**Mass:**



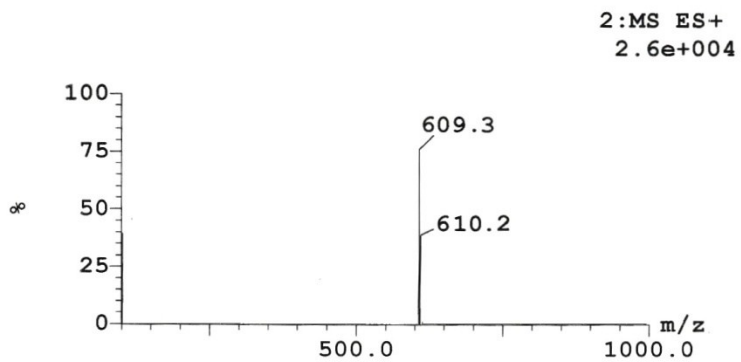

**Compound 6: 5-(4-methoxyphenyl)-2-(2-methyl-1H-indol-3-yl)-1-oxa-3-azaspiro[5.5]undecane**

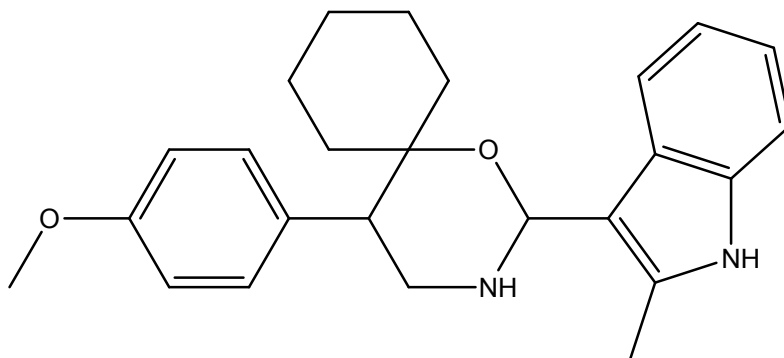

**<sup>1</sup>H-NMR:**

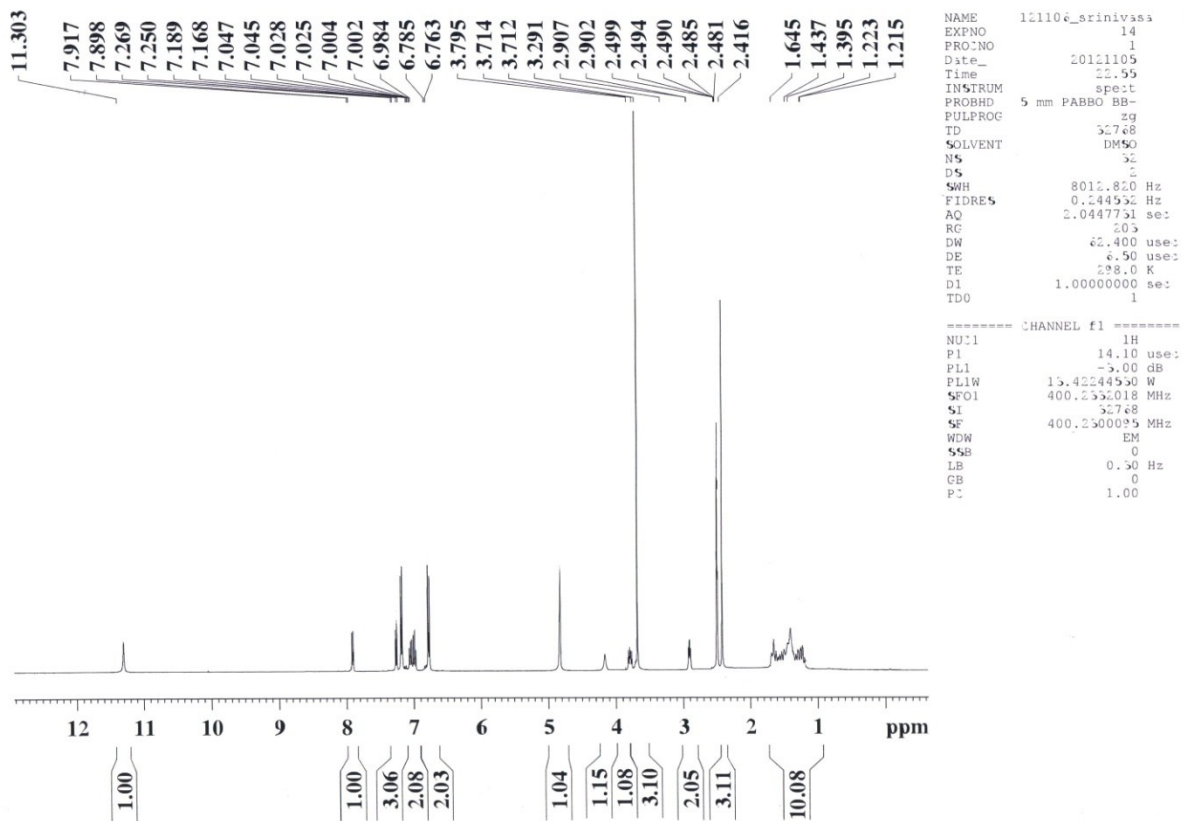

**<sup>13</sup>C-NMR:**

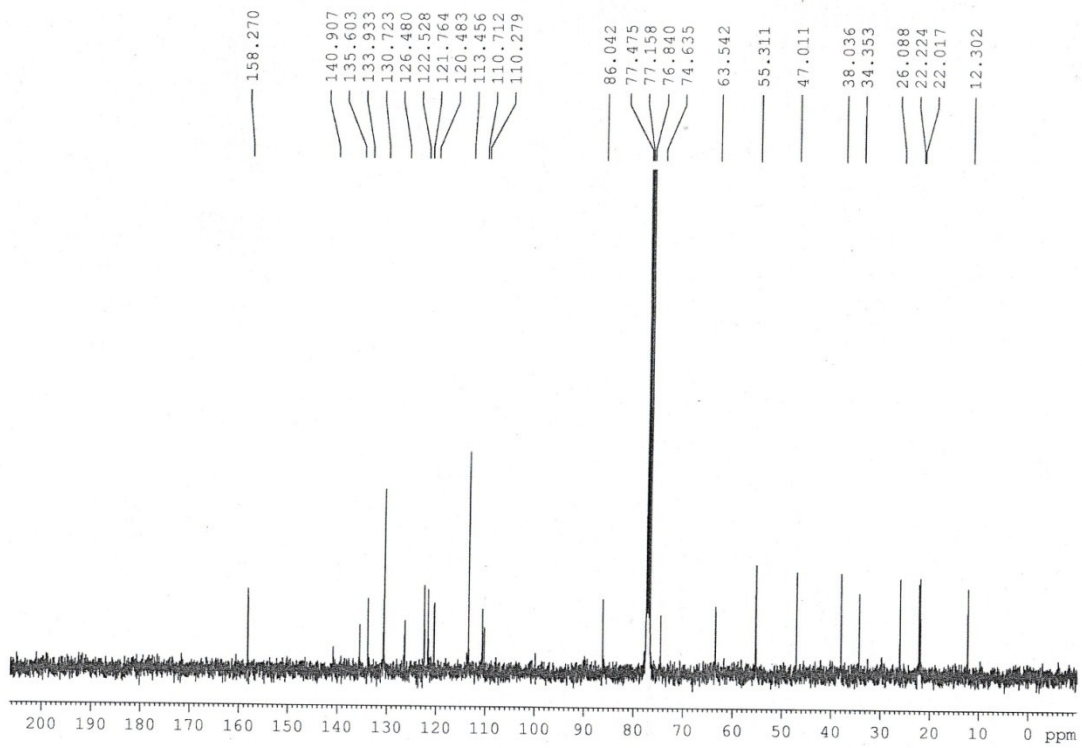

**Mass:**

2:MS ES+  
1.7e+004

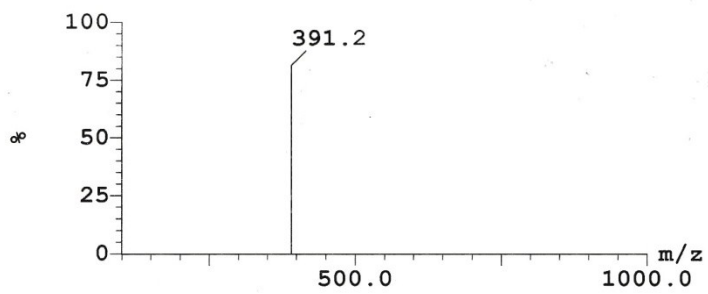

**Compound 7: 5-(4-methoxyphenyl)-2-(2-phenyl-1H-indol-3-yl)-1-oxa-3-azaspiro[5.5]undecane**

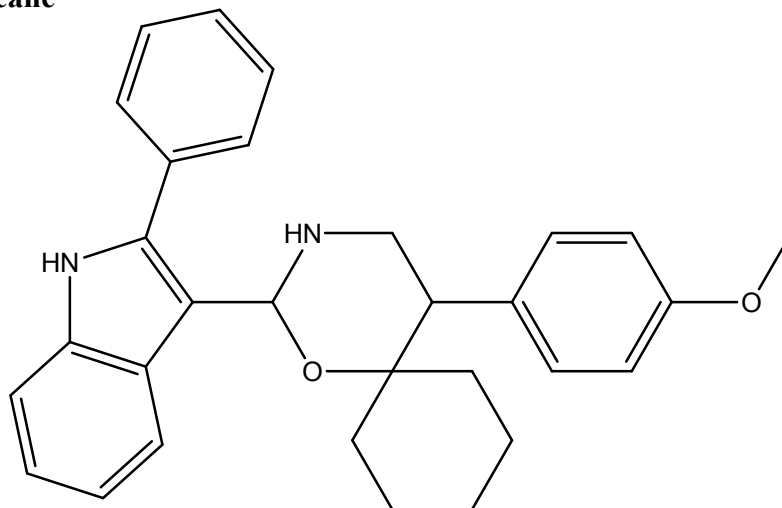

**<sup>1</sup>H-NMR:**

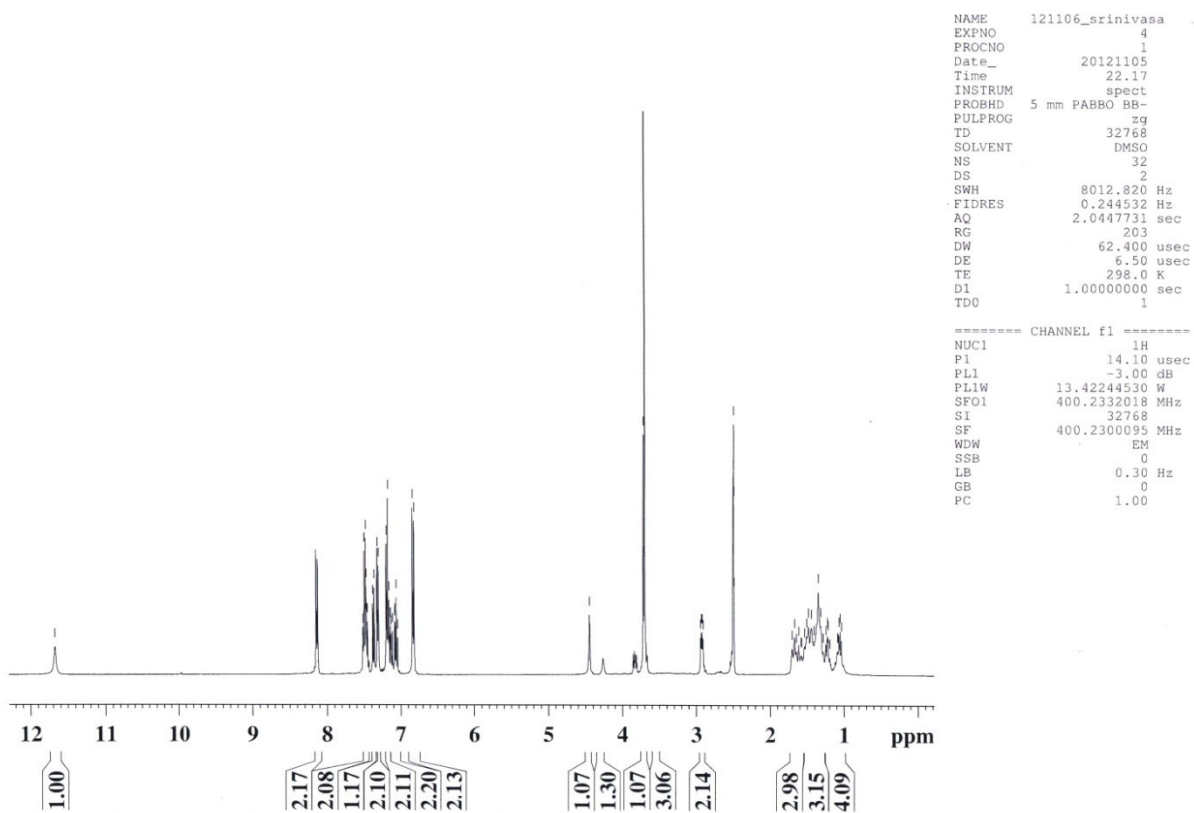

**<sup>13</sup>C-NMR:**

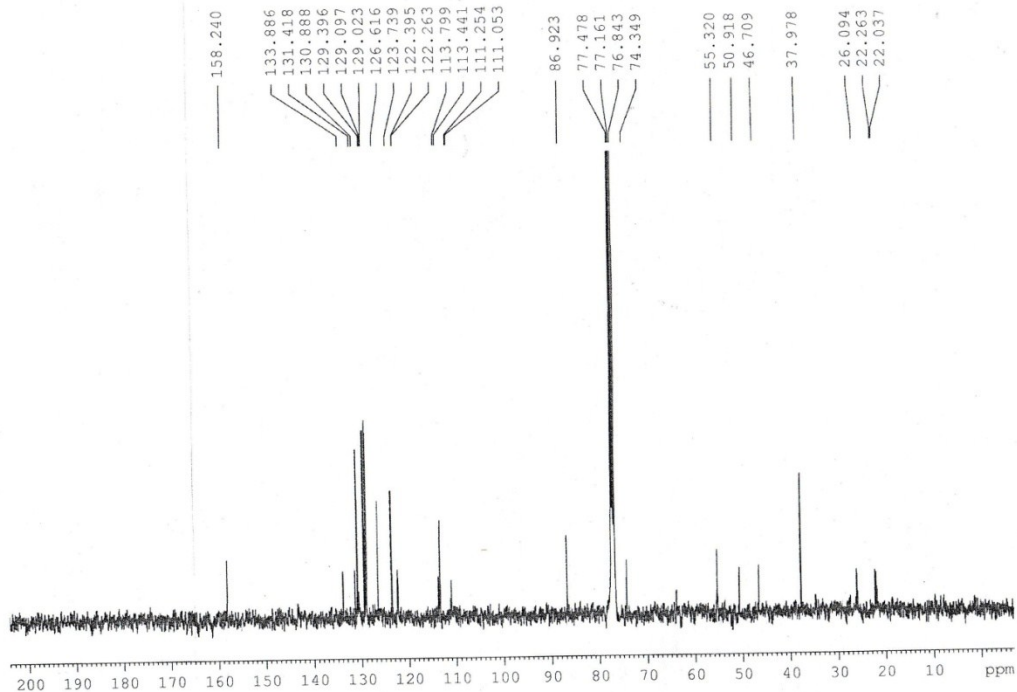

**Mass:**

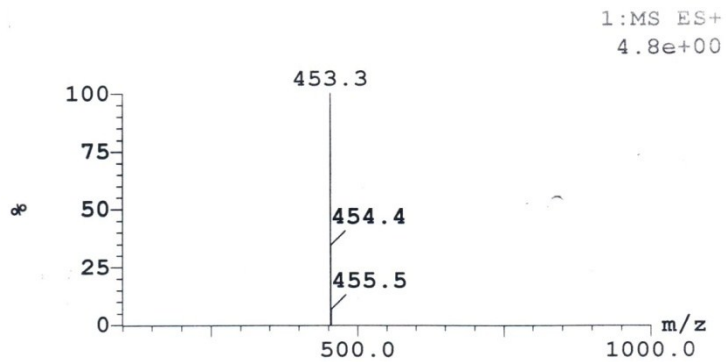

**Compound 8: 2-(2-butyl-4-chloro-1-(4-nitrobenzyl)-1H-imidazol-5-yl)-2,4-dihydro-1H-benzo[d][1,3]oxazine**

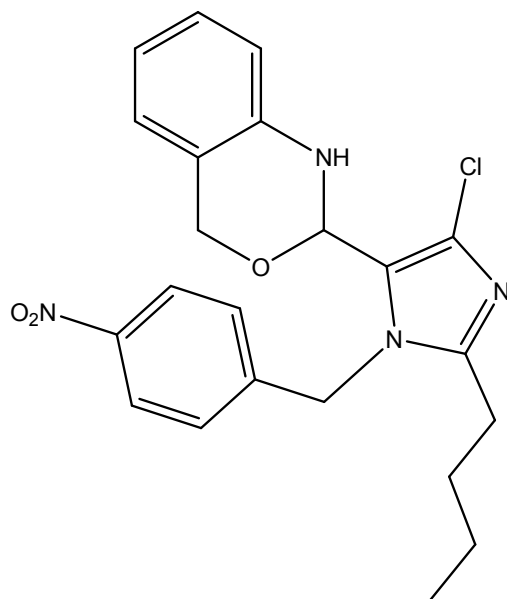

**<sup>1</sup>H-NMR:**

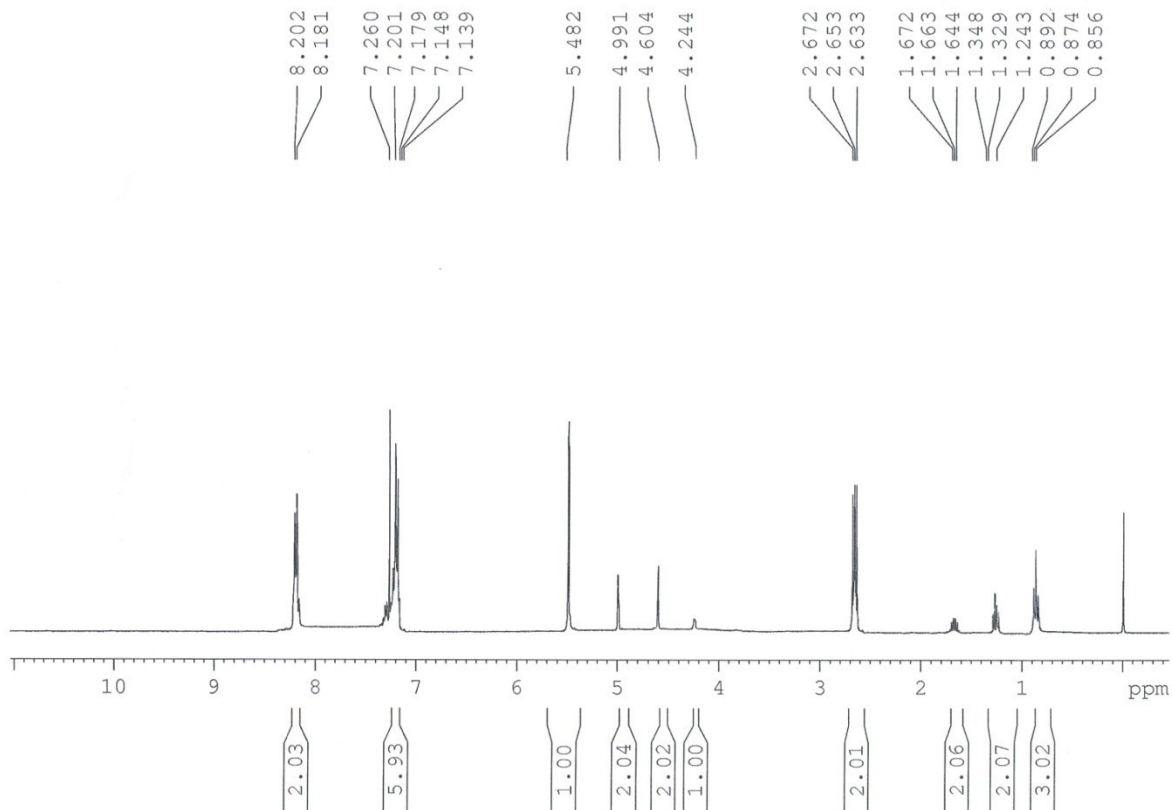

<sup>13</sup>C-NMR:

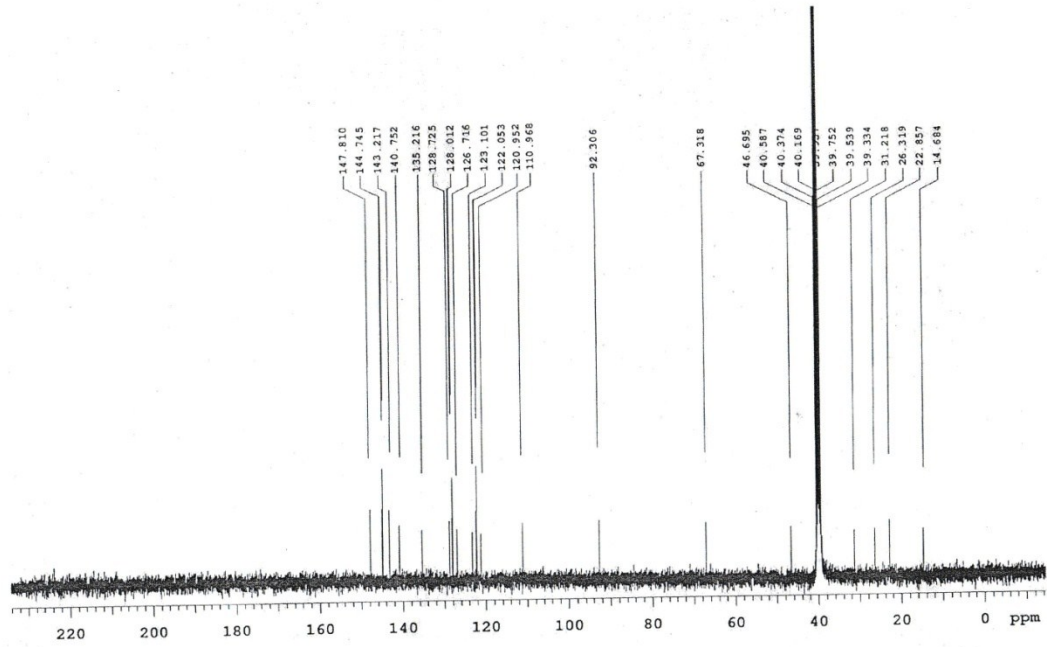

**Mass:**

1:MS ES+  
1.2e+006

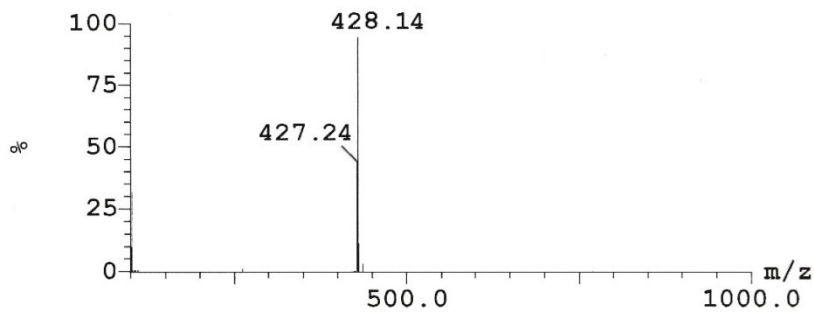



**Compound 12: 4-(5-(4-methoxyphenyl)-1-oxa-3-azaspiro[5.5]undecan-2-yl)-N,N-dimethylaniline**

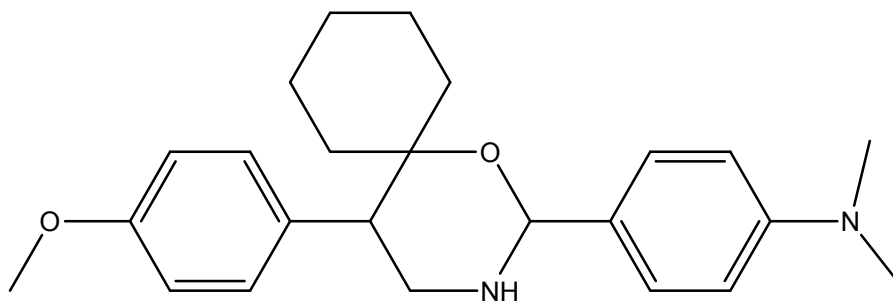

**<sup>1</sup>H-NMR:**

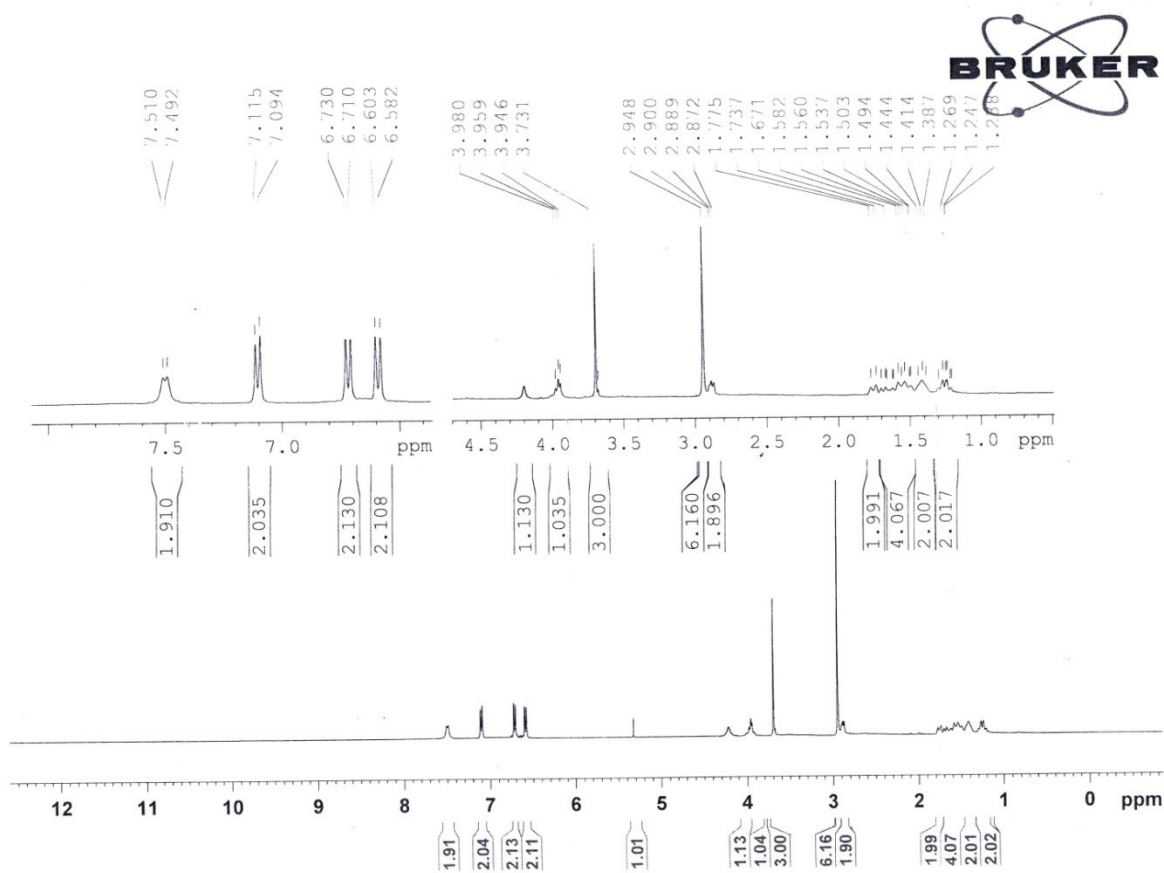

**<sup>13</sup>C-NMR:**

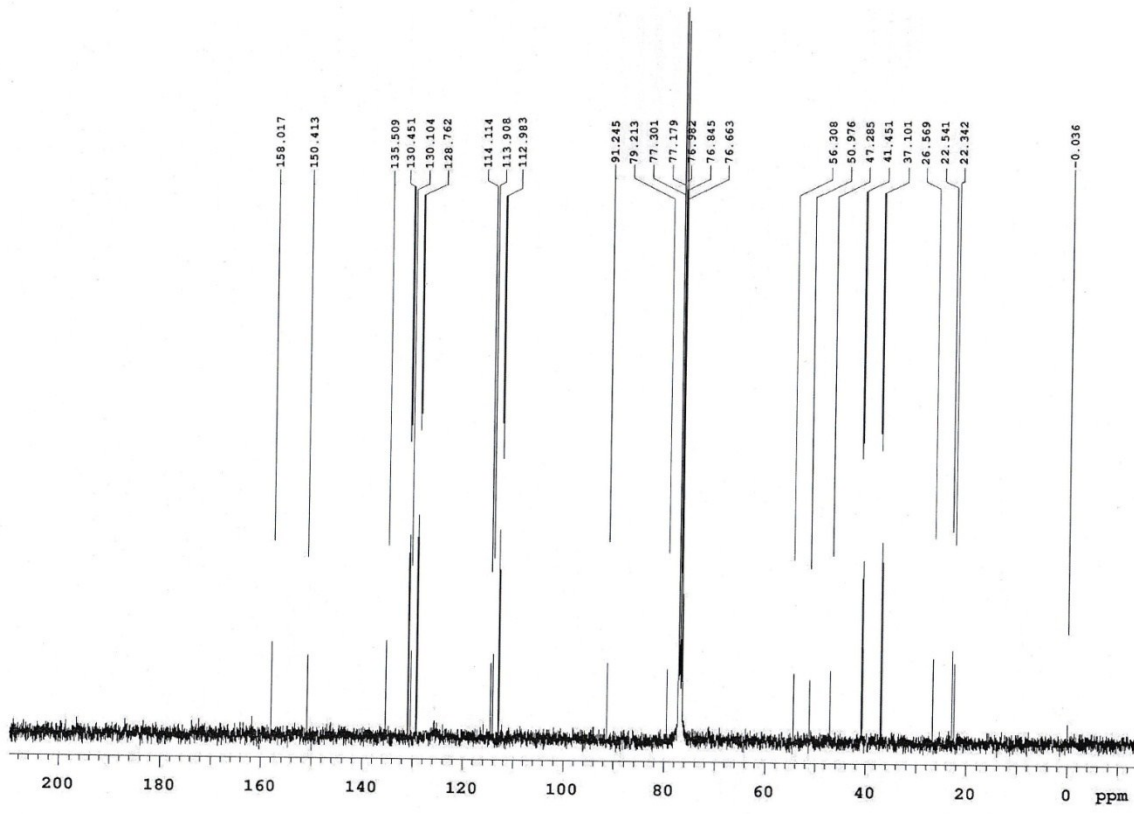

# Mass:

|                              |                |              |                 |                          |         |
|------------------------------|----------------|--------------|-----------------|--------------------------|---------|
| Method                       | DEF_MS.M       | Operator     | MBU             |                          |         |
| Sample Name                  |                | Instrument   | HCTultra ETD II |                          |         |
| <b>Acquisition Parameter</b> |                |              |                 |                          |         |
| Ion Source Type              | ESI            | Ion Polarity | Positive        | Alternating Ion Polarity | off     |
| Mass Range Mode              | 200000 $\mu$ s | Scan Begin   | 50 m/z          | Scan End                 | 800 m/z |
| Capillary Exit               | 109.0 Volt     | Skimmer      | 40.0 Volt       | Trap Drive               | 49.6    |
| Accumulation Time            | Ultra Scan     | Averages     | 5 Spectra       | Auto MS/MS               | off     |

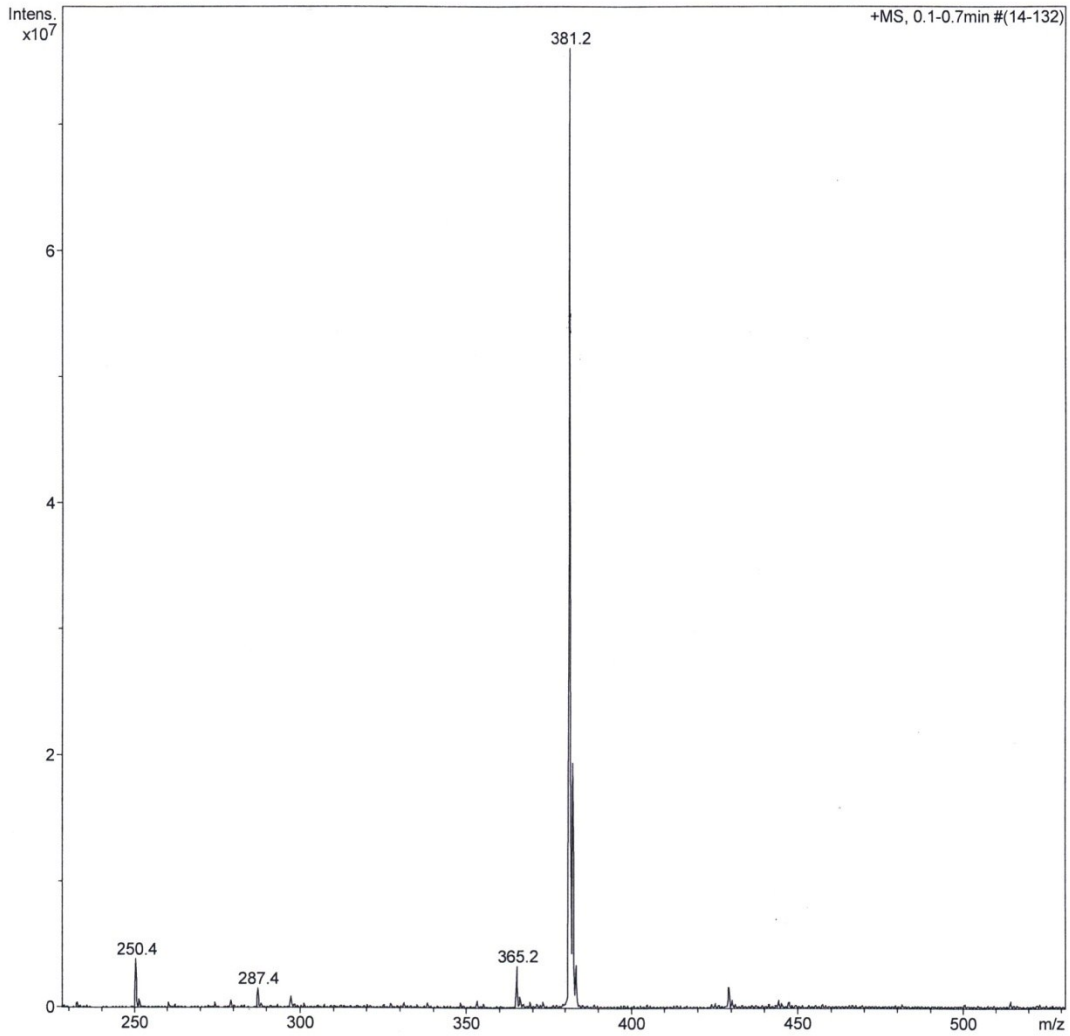

**Compound 13: 3-(5-(4-methoxyphenyl)-1-oxa-3-azaspiro[5.5]undecan-2-yl)-4H-chromen-4-one**

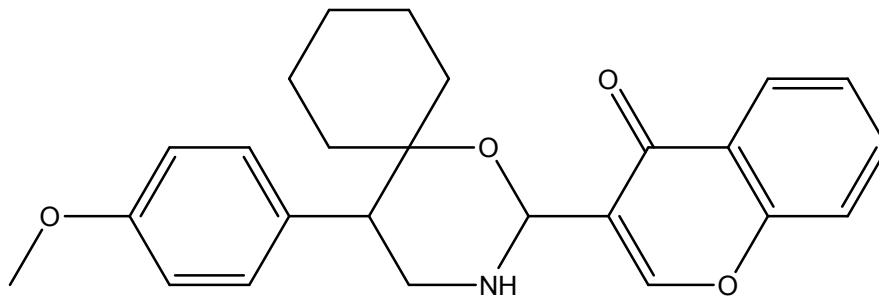

**<sup>1</sup>H-NMR:**

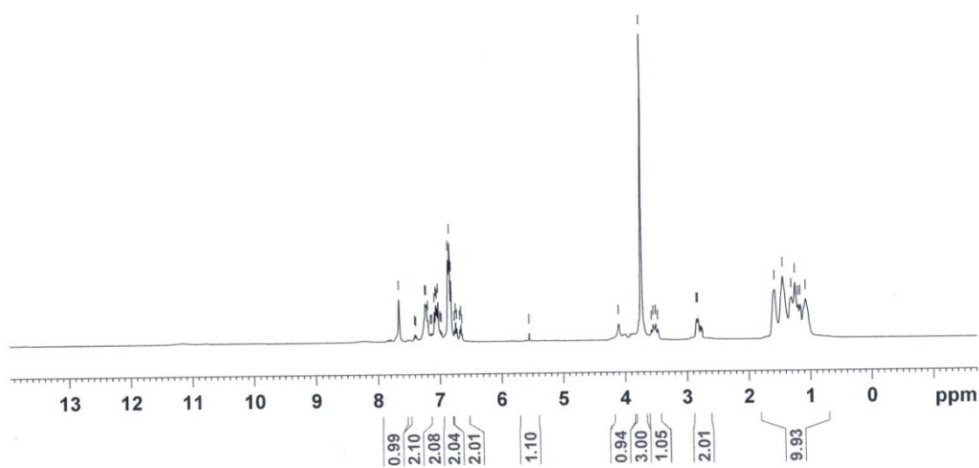

**<sup>13</sup>C-NMR:**

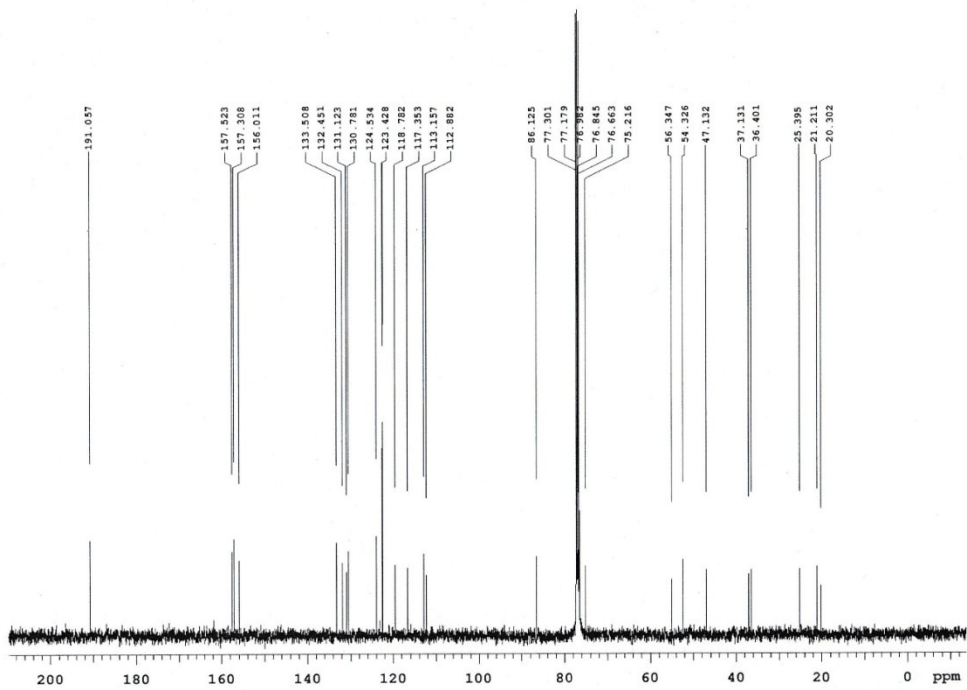

**Mass:**

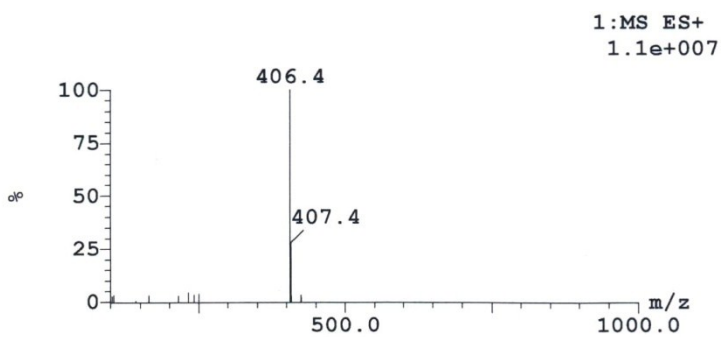

**Compound 21: 2-(2-butyl-4-chloro-1-(4-phenoxybenzyl)-1H-imidazol-5-yl)-5-(4-methoxyphenyl)-1-oxa-3-azaspiro[5.5]undecane**

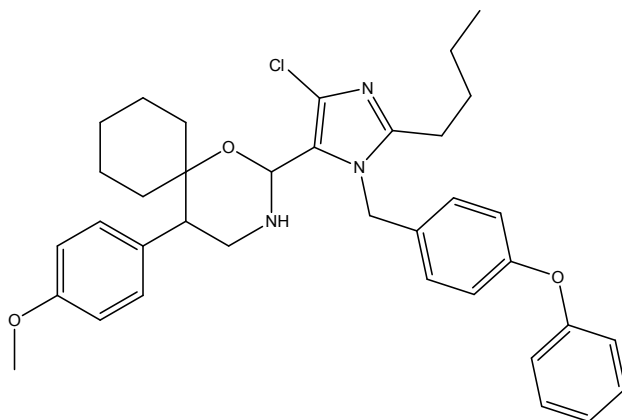

**<sup>1</sup>H-NMR:**

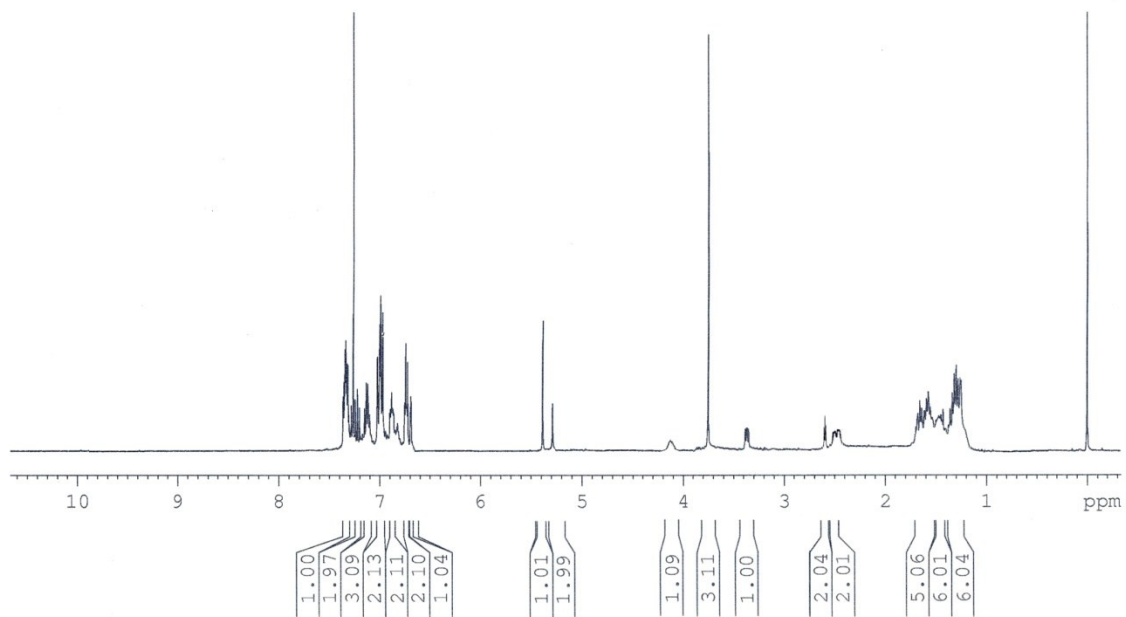

<sup>13</sup>C-NMR:

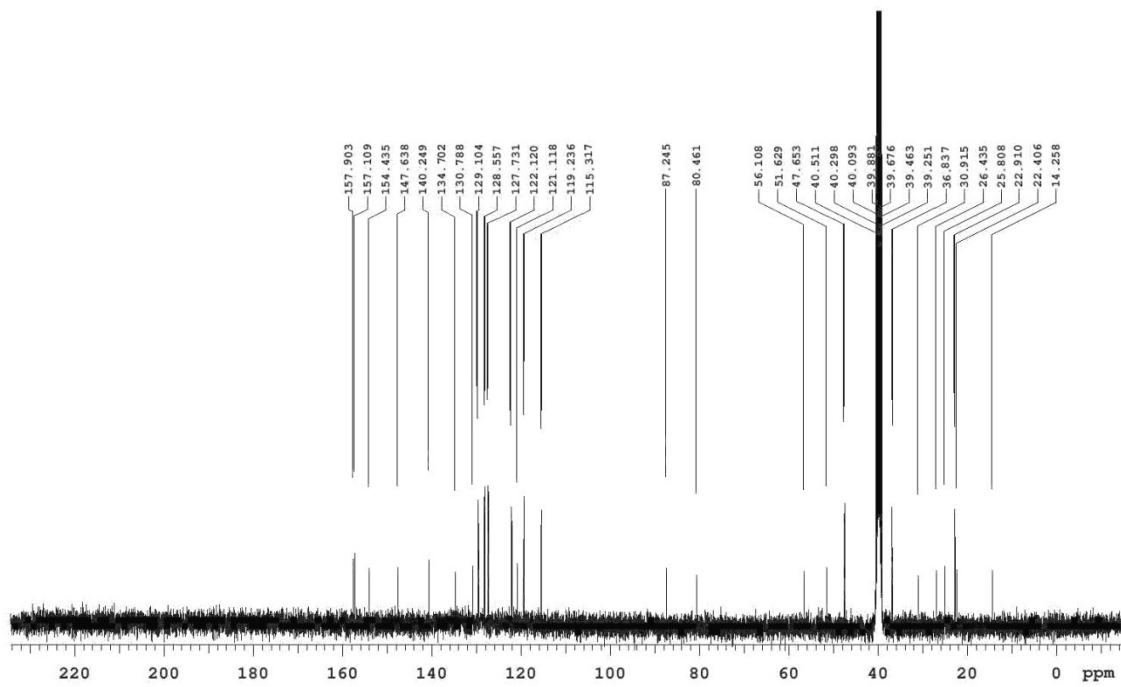



**Mass:**

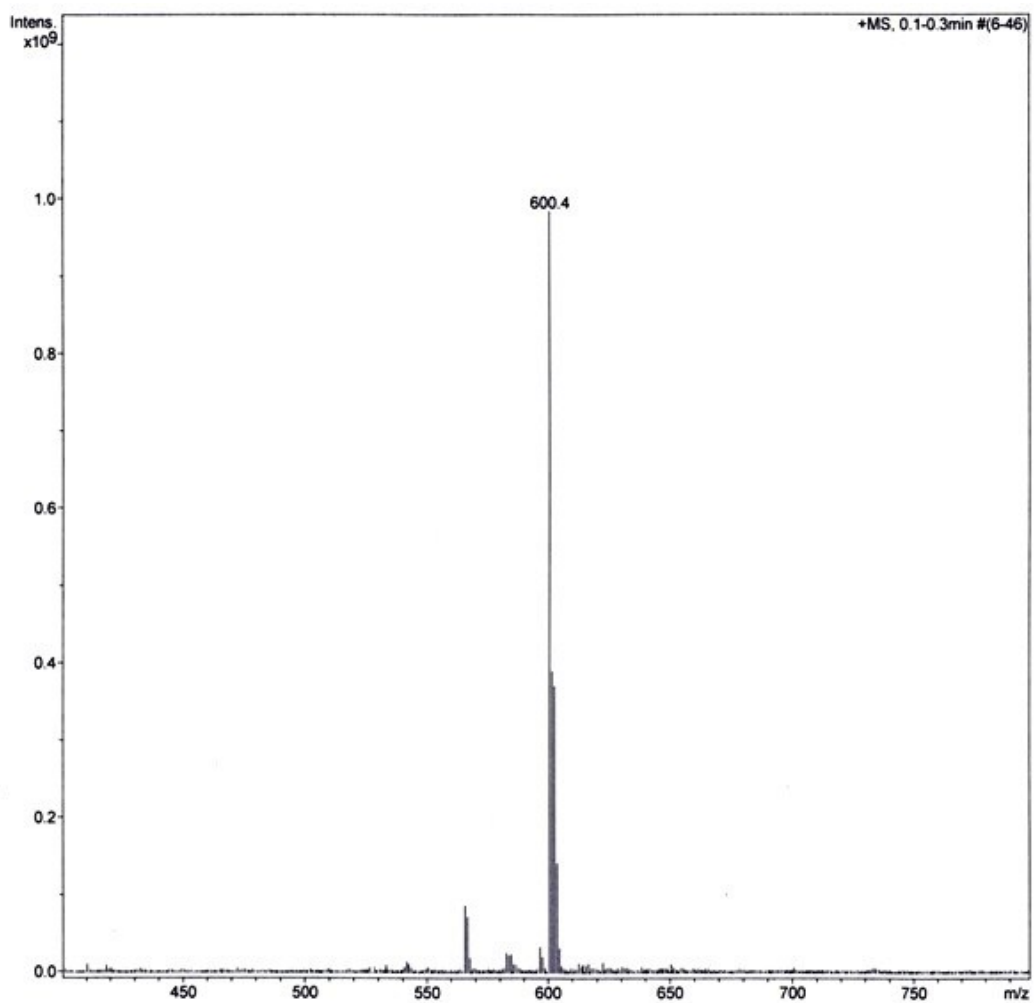

Supplement: c5ob00791g1.pdf [file c5ob00791g1.pdf]
